# Supplementary material for: Multifunctional additive enables lead-adsorbing carbon electrodes for perovskite solar cells
Source: Royal Society of Chemistry journal article supplement (doi:10.1039/d4ta05429f), 2024-01-01
Supplement: d4ta05429f1.pdf [file d4ta05429f1.pdf]

## Supplementary Information

### Multifunctional additive enables lead-adsorbing carbon electrodes for perovskite solar cells

Yuanzhu Jiang<sup>1,2</sup>, Aodong Zhu<sup>1,2</sup>, Teng Liao<sup>1,2</sup>, Wang Zhao<sup>1,2</sup>, Mengmeng Cheng<sup>1,2</sup>,  
Xinxin Zhang<sup>3</sup>, Yi-Bing Cheng<sup>2,4</sup>, Junyan Xiao<sup>1,2,4,\*</sup>

<sup>1</sup> School of Materials Science and Engineering, Wuhan University of Technology, 122 Luoshi Road, Wuhan, Hubei, China

<sup>2</sup> State Key Laboratory of Advanced Technologies for Materials Synthesis and Processing, Wuhan University of Technology, 122 Luoshi Road, Wuhan, Hubei, China

<sup>3</sup> School of Chemistry and Chemical Engineering, Huazhong University of Science and Technology, 1037 Luoyu Road, Wuhan, Hubei, China

<sup>4</sup> Research Centre for Advanced Thin Film Photovoltaics, Wuhan University of Technology, 122 Luoshi Road, Wuhan, Hubei, China

**\*Corresponding author.**

E-mail: xiaojunyan@whut.edu.cn (Xiao J.)

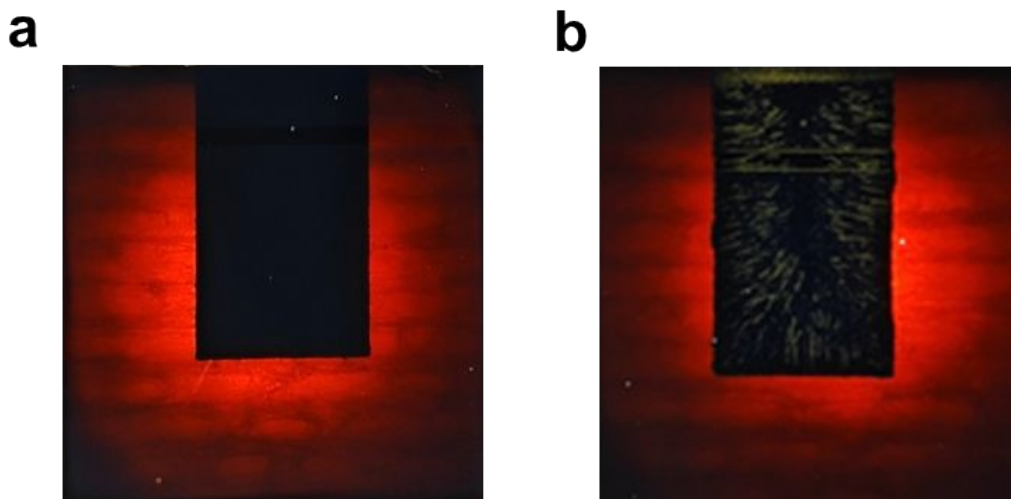

**Figure S1** Photograph of backside of PSCs devices with p-PG deposited on. (a) Undamaged. (b) Damaged.

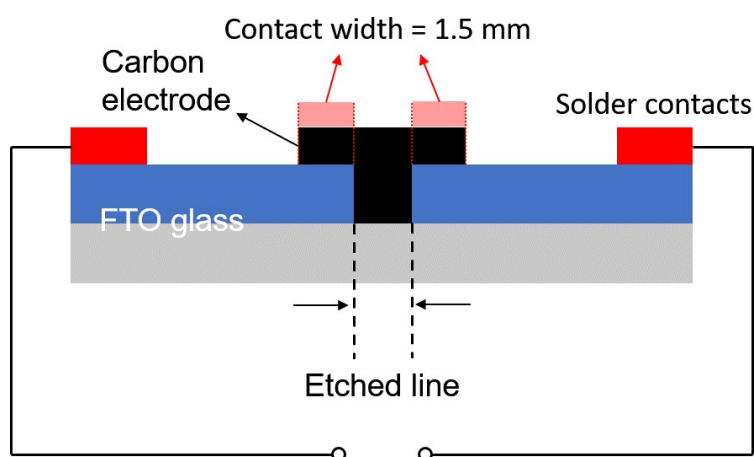

**Figure S2** Schematic diagram for FTO/carbon electrode contacts resistance measurement.

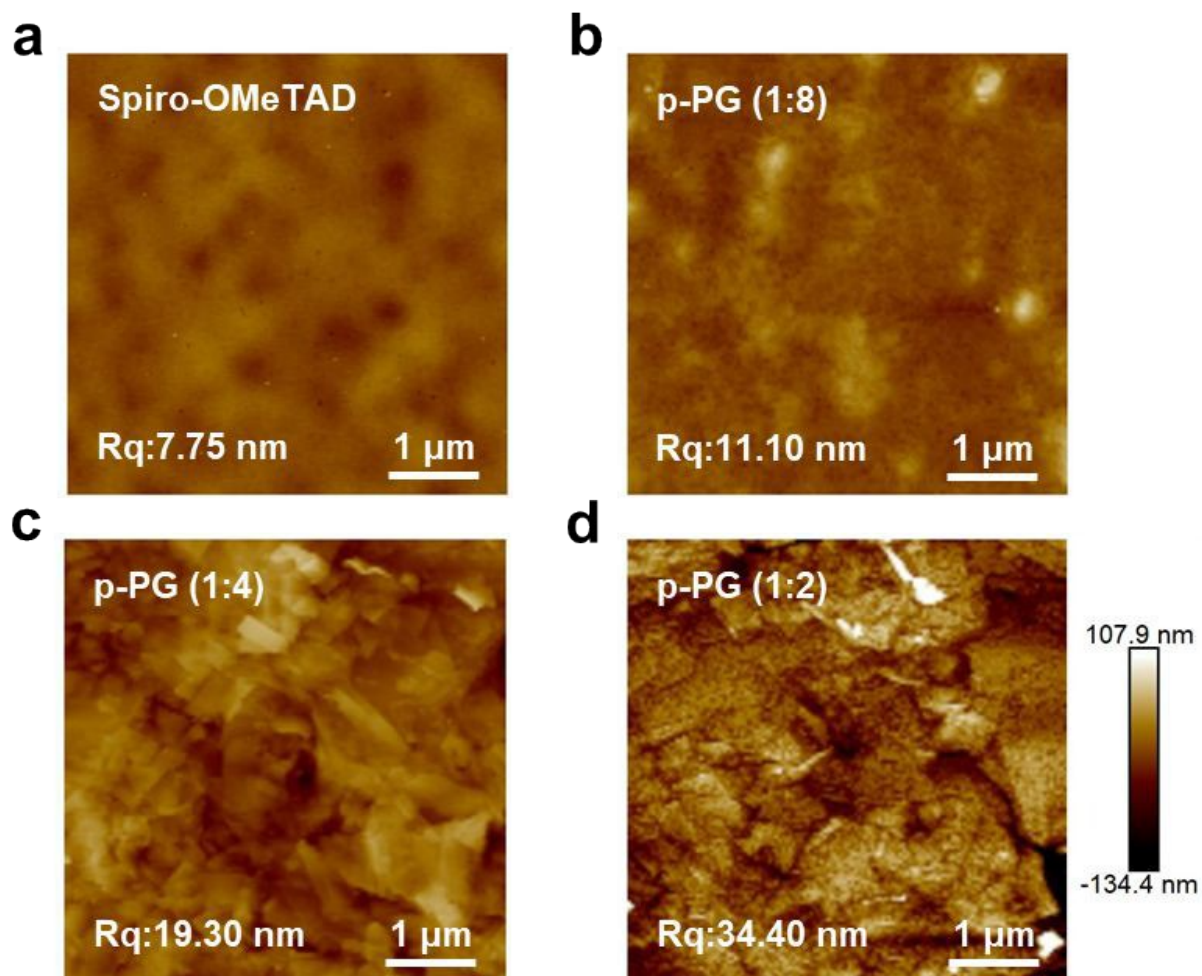

**Figure S3** Atomic force microscope images of (a) Spiro-OMeTAD and (b-d) p-PG on semi-devices.

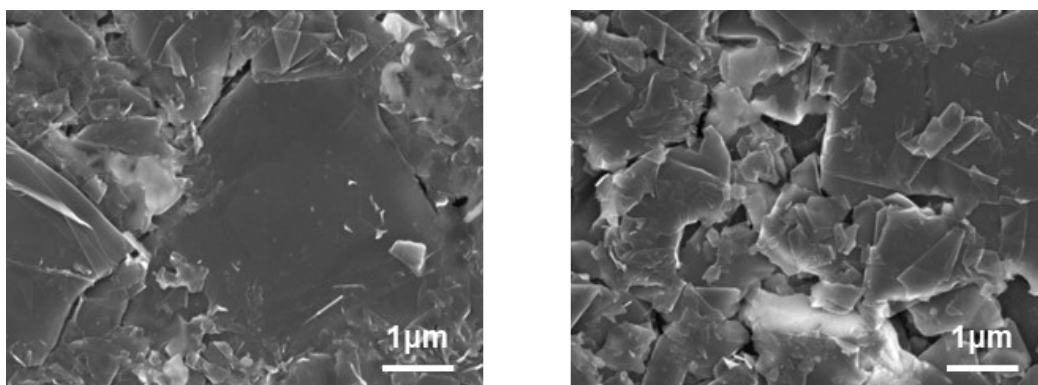

**Figure S4** Top view SEM images of p-PG with sodium dihydrogen phosphate crystals

**Figure S5** The steady-state output current and calculated PCE of the champion p-PG (1:8) based device.

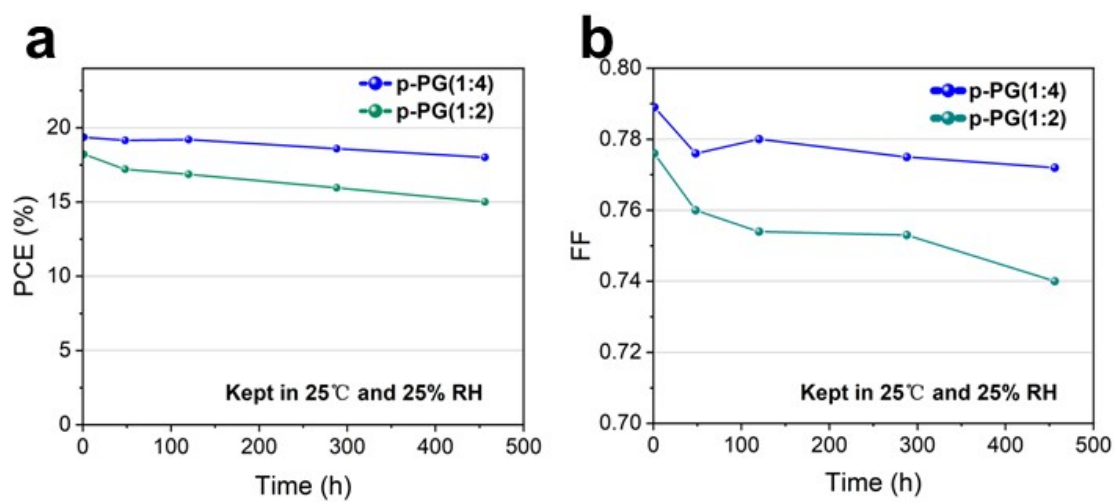

**Figure S6** Storage stability of p-PG(1:4) and p-PG(1:2) based device.

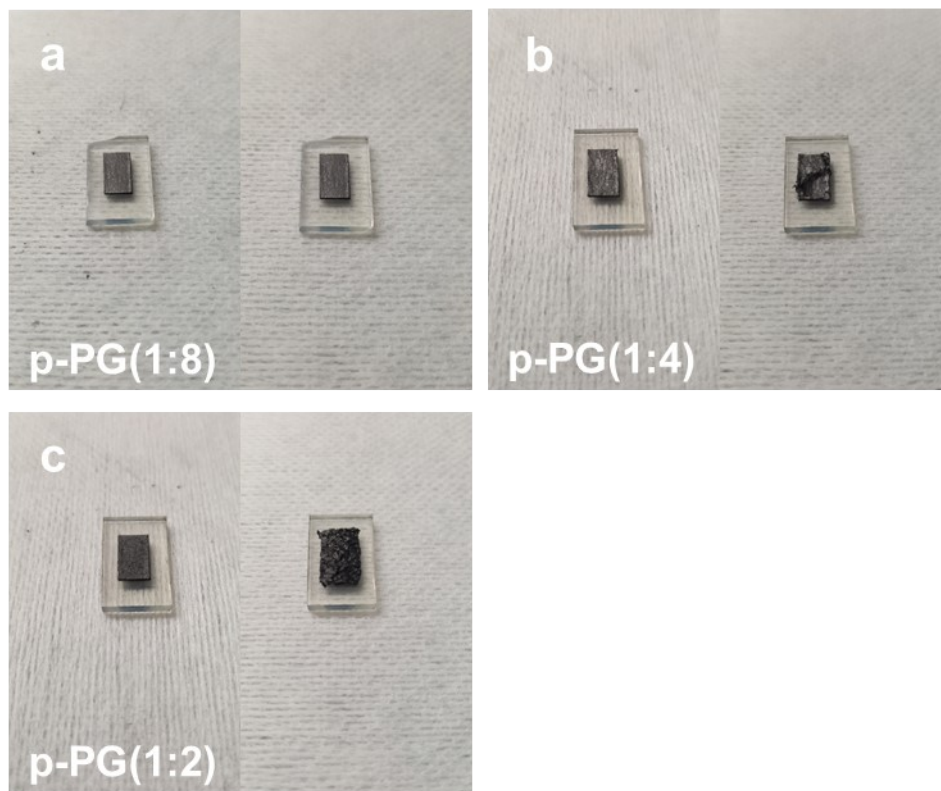

**Figure S7** Photographs of p-PG with different mixing ratios before and after moisture absorption in the same humidity environment.

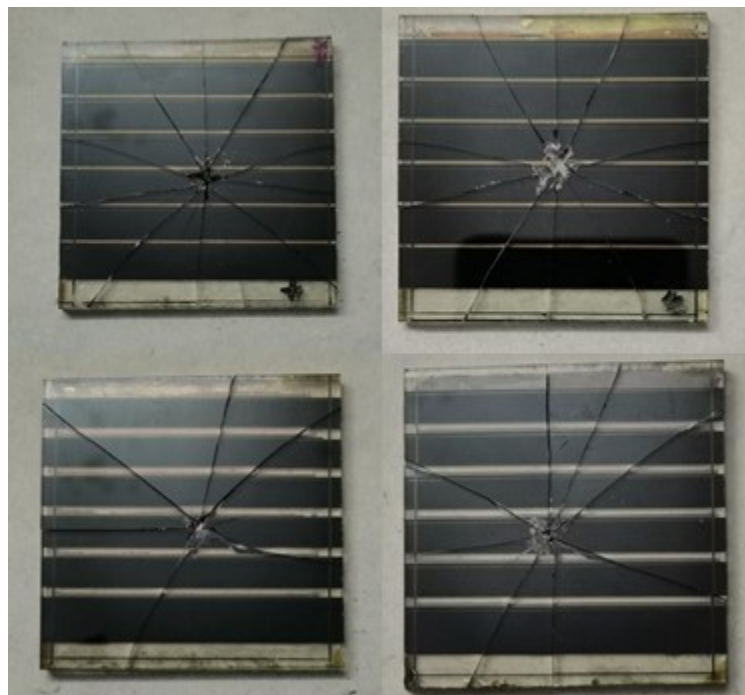

**Figure S8** Photographs of damaged devices in lead leakage test.

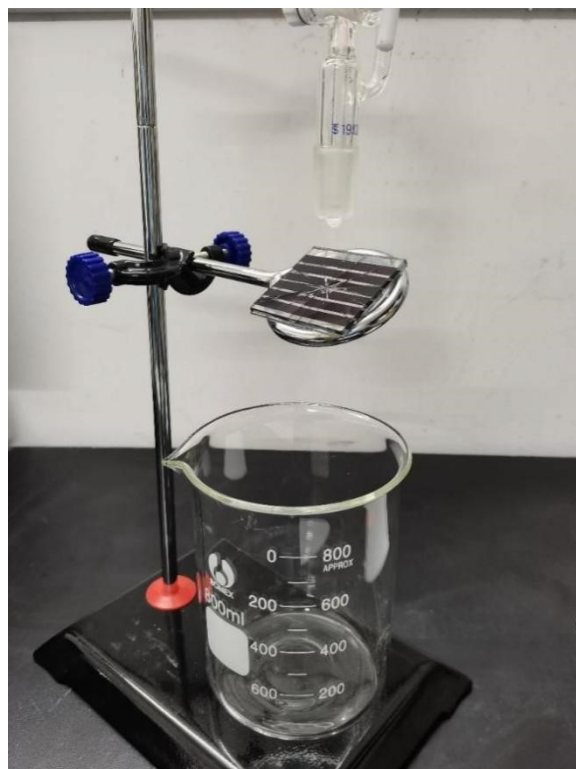

**Figure S9** Photograph of water-dripping test equipment setup.

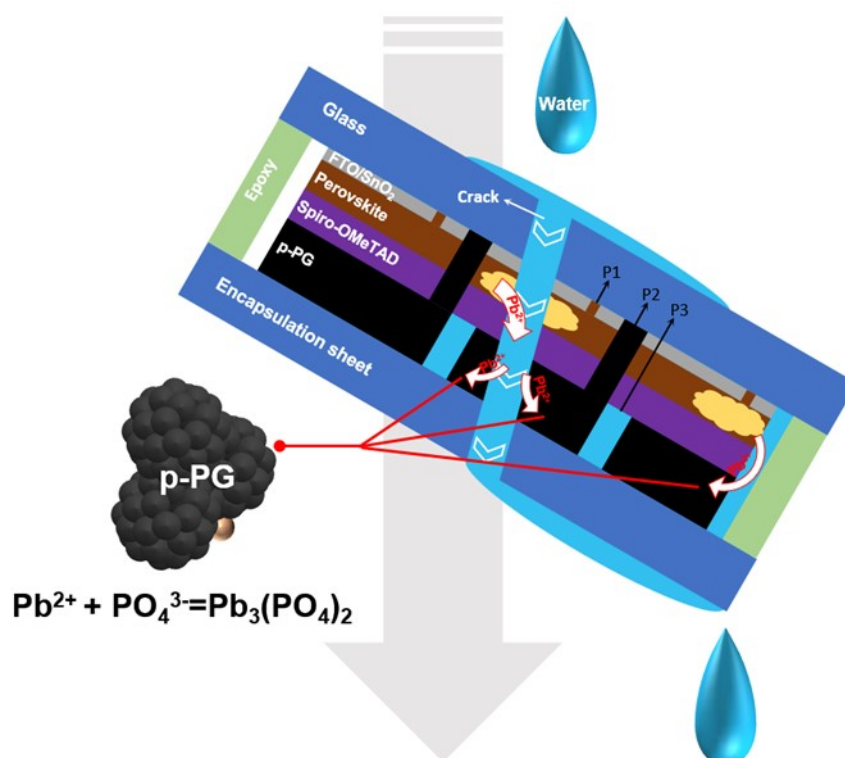

**Figure S10** Schematic diagram of the gravitational-driven directional flow of effluent enhances the adsorption efficiency of Pb<sup>2+</sup> onto carbon electrodes.
